# Supplementary material for: Lignin as a Partial Polyol Replacement in Polyurethane Flexible Foam
Source: MDPI journal article supplement (doi:10.3390/molecules26082302), 2021-04-15
Supplement: s1 [file s1]

## **Supplementary Information**

*Table S1: List of lignin samples used in the flexible PU foam formulations and their measured OH content (<sup>31</sup>P NMR results).*

| No. | Process    | Source       | ID      | Aliphatic-OH<br>(mmol/g) | Ph-OH<br>(mmol/g) | COOH<br>(mmol/g) | Total Hydroxyl<br>Content<br>(mmol/g) |
|-----|------------|--------------|---------|--------------------------|-------------------|------------------|---------------------------------------|
| 1   | Kraft      | Softwood     | 1-K-SW  | 2.0                      | 3.20              | 0.43             | 5.61                                  |
| 2   | Organosolv | Hardwood     | 2-O-HW  | 1.4                      | 2.83              | 0.32             | 4.56                                  |
| 3   | Organosolv | Corn Stover  | 3-O-CS  | 2.3                      | 1.11              | 0.53             | 3.90                                  |
| 4   | Kraft      | Softwood     | 4-K-SW  | 2.0                      | 3.41              | 0.48             | 5.92                                  |
| 5   | Organosolv | Peanut Shell | 5-O-PS  | 1.3                      | 1.87              | 0.26             | 3.48                                  |
| 6   | Kraft      | Softwood     | 6-K-SW  | 1.9                      | 3.42              | 0.41             | 5.72                                  |
| 7   | Kraft      | Softwood     | 7-K-SW  | 1.8                      | 3.15              | 0.43             | 5.37                                  |
| 8   | Organosolv | Hardwood     | 8-O-HW  | 0.8                      | 3.03              | 0.26             | 4.08                                  |
| 9   | Kraft      | Softwood     | 9-K-SW  | 1.8                      | 4.39              | 0.56             | 6.70                                  |
| 10  | Kraft      | Bagasse      | 10-K-BA | 3.6                      | 0.49              | 0.54             | 4.63                                  |
| 11  | Kraft      | Softwood     | 11-K-SW | 2.4                      | 3.71              | 0.37             | 6.42                                  |
| 12  | Kraft      | Softwood     | 12-K-SW | 1.8                      | 2.86              | 0.58             | 5.22                                  |
| 13  | Kraft      | Softwood     | 13-K-SW | 1.5                      | 1.92              | 0.04             | 3.49                                  |
| 14  | Organosolv | Hardwood     | 14-O-HW | 1.7                      | 3.29              | 0.24             | 5.19                                  |
| 15  | Kraft      | Hardwood     | 15-K-HW | 1.2                      | 5.44              | 0.16             | 6.79                                  |

Correlations between the Density and CFD with the Aliphatic, Phenolic, and Carboxylic OH content of lignins are shown in Table 2-4. As can be seen, most of them are not statistically significant. Only there is a significant correlation between CFD and phenolic OH of lignin ( $p$ -value of 0.036), but the correlation is very low (0.54).

*Table S2: Summary of Pearson Correlation Matrix of Density and CFD with Aliphatic OH*

| Pearson Correlation Coefficient | Aliphatic OH | P-value |
|---------------------------------|--------------|---------|
| Density                         | 0.0079       | 0.977   |
| CFD                             | 0.0951       | 0.735   |

*Table S3: Summary of Pearson Correlation Matrix of Density and CFD with Phenolic OH*

| Pearson Correlation Coefficient | Phenolic OH | P-value |
|---------------------------------|-------------|---------|
| Density                         | 0.487       | 0.065   |
| CFD                             | 0.542       | 0.036   |

*Table S4: Summary of Pearson Correlation Matrix of Density and CFD with Carboxylic OH*

| Pearson Correlation Coefficient | Carboxylic OH | P-value |
|---------------------------------|---------------|---------|
| Density                         | 0.0574        | 0.8387  |
| CFD                             | 0.2804        | 0.3114  |
